# Supplementary material
Source: PubMed Central journal article supplement (PMC3676046)

**Figure S1: Growth of *D. vulgaris* wild type and *roo1* and *roo2* mutated strains upon exposure to GSNO.**

*D. vulgaris* wild type (A), and strains mutated in *roo1* (B) and *roo2* (C) that reach the early exponential growth phase ( $OD_{600} \sim 0.3$ ) were left untreated (○), treated with 10  $\mu$ M GSNO (●) and with 50  $\mu$ M GSNO (◆).

Experiments were performed for two biological independent samples with two replicates.

Values represent means  $\pm$  standard error.

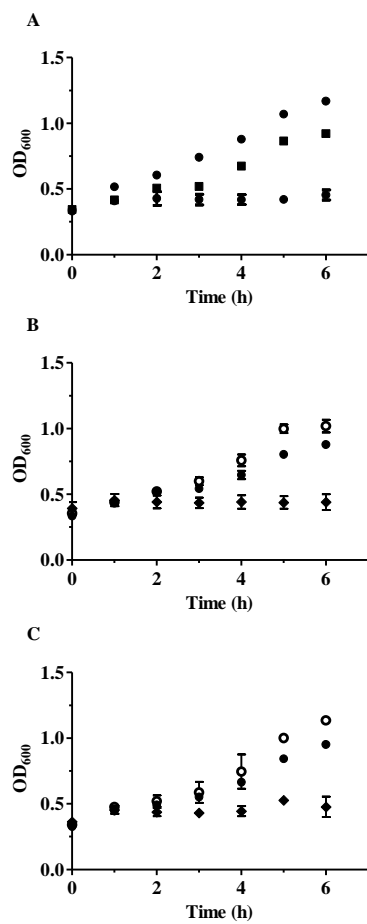

**Figure S2: Viability of *D. vulgaris* cells in DMEM**

Viability of *D. vulgaris* cells inoculated in well plates containing DMEM medium (time zero, black bars) and after incubated with 5% CO<sub>2</sub>, at 37 °C for 24 h (grey bars). Experiments were performed in triplicate and values represent means ± standard error.

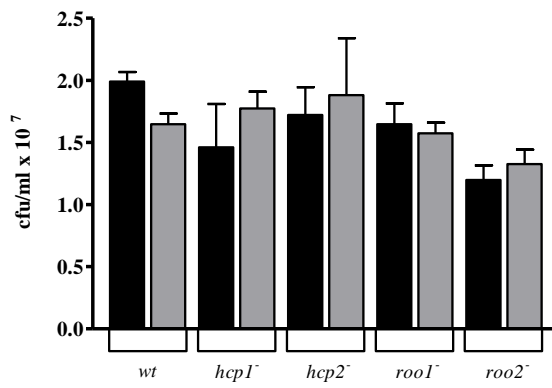

Supplement: JB.00074-13_zjb999092621so1.pdf [file JB.00074-13_zjb999092621so1.pdf]
